# Supplementary material for: The development of a dedicated polymer support for the solid-phase oligosaccharide synthesis
Source: Royal Society of Chemistry journal article supplement (doi:10.1039/d0cc03885g), 2020-01-01
Supplement: d0cc03885g1.pdf [file d0cc03885g1.pdf]

## **Supporting Information**

### **The development of a dedicated polymer support for the solid-phase oligosaccharide synthesis**

Matteo Panza, Dharmendra Neupane, Keith J. Stine, and Alexei V. Demchenko\*

*Department of Chemistry and Biochemistry, University of Missouri – St. Louis, One University  
Boulevard, St. Louis, Missouri 63121, USA*

[demchenkoa@umsl.edu](mailto:demchenkoa@umsl.edu)

## **Contents**

|                                                                                         |     |
|-----------------------------------------------------------------------------------------|-----|
| General Methods                                                                         | S2  |
| Set up of the HPLC-A synthesizer                                                        | S2  |
| Figure S1. The synthesizer set up with the two channels of the valve                    | S3  |
| Synthesis of Crosslinker and Panzagal resin                                             | S3  |
| Synthesis of Glycosyl Donors and Glycosyl Acceptors                                     | S4  |
| Preparation of the reagent vials                                                        | S4  |
| The Automated Assembly of Oligosaccharides                                              | S4  |
| Figure S2. Settings of the components of the HPLC synthesizer during glycosylation      | S6  |
| Figure S3. Settings of the components of the HPLC synthesizer during Fmoc removal       | S8  |
| Figure S4. Settings of the components of the HPLC synthesizer during the final cleavage | S10 |
| Figure S5. UV traces for the synthetic steps                                            | S12 |
| Synthesis of disaccharide <b>8</b>                                                      | S13 |
| Synthesis of pentasaccharide <b>9</b>                                                   | S14 |
| TGA of Panzagal-TMSOTf (Figures S6-S8)                                                  | S15 |
| SEM images of Panzagal-TMSOTf (Figure S9)                                               | S16 |
| BETBJH analysis (Figure S10)                                                            | S17 |
| References                                                                              | S17 |
| IR spectra                                                                              | S18 |
| NMR spectra                                                                             | S21 |

## **General Methods**

The reactions were performed using commercial reagents and the ACS grade solvents were purified and dried according to standard procedures. HPLC grade solvents used for automation were utilized without any further purification. Column chromatography was performed on silica gel 60 (70–230 mesh) or on Biotage Isolera One, reactions were monitored by TLC on Kieselgel 60 F254. The compounds were detected by examination under UV light and by charring with 10% sulfuric acid in methanol. Solvents were removed under reduced pressure at <40 °C. CH<sub>2</sub>Cl<sub>2</sub> was distilled from CaH<sub>2</sub> directly prior to application. Pyridine was dried by refluxing with CaH<sub>2</sub> and then distilled and stored over molecular sieves (3 Å). Amberlite IR20 (H<sup>+</sup>) was washed three times with MeOH and stored under MeOH. Optical rotations were measured using a Jasco ‘P-2000’ polarimeter. IR spectra were recorded using an Agilent Cary 630 FTIR or a Thermo Nicolet Avatar 360 FTIR. <sup>1</sup>H NMR spectra were recorded at 300 or 600 MHz, <sup>13</sup>C NMR spectra were recorded at 75 or 150 MHz. The <sup>1</sup>H chemical shifts are referenced to the signal of the residual CHCl<sub>3</sub> (δH = 7.24 ppm). The <sup>13</sup>C chemical shifts are referenced to the central signal of CDCl<sub>3</sub> (δC = 77.23 ppm). HRMS determinations were made with the use of a mass spectrometer with FAB ionization and ion-trap detection. Agilent 1260 infinity II HPLC System and Agilent 1260 Variable Wavelength UV–vis Detector were used to assemble the automated synthesizer.

The surface morphology of the polymer was characterized using scanning electron microscopy using JEOL JSM-6320F field emission scanning electron microscope (JEOL USA Inc. California USA). The surface area and the total pore volume were calculated from the N<sub>2</sub> adsorption/desorption isotherms, obtained using automated surface area analyser (BECKman Coulter SA-3100 Gas Adsorption Surface Area and Pore Size Analyzer, Beckman Coulter, Inc, California, USA). Thermogravimetric analysis was done using Q500 Thermogravimetric analyzer (TA instruments, Delaware, USA).

### **Set up of the HPLC-A synthesizer**

The HPLC based synthesizer has been assembled using

- 1260 Agilent Infinity I series Quaternary Pump
- Variable Wavelength Detector with single-wavelength mode
- The Autosampler is the analytical module from 1260 Infinity series. The autosampler is equipped a 900 μL loop and one tray holding 100 x 2 mL vials.
- The valve is a 2-way 6-port Quick Change Valve.
- The column utilized is an Omnifit Solvent Plus 50 mm.

The synthesis sequences are programmed using Chemstation software and the autosampler programming option.

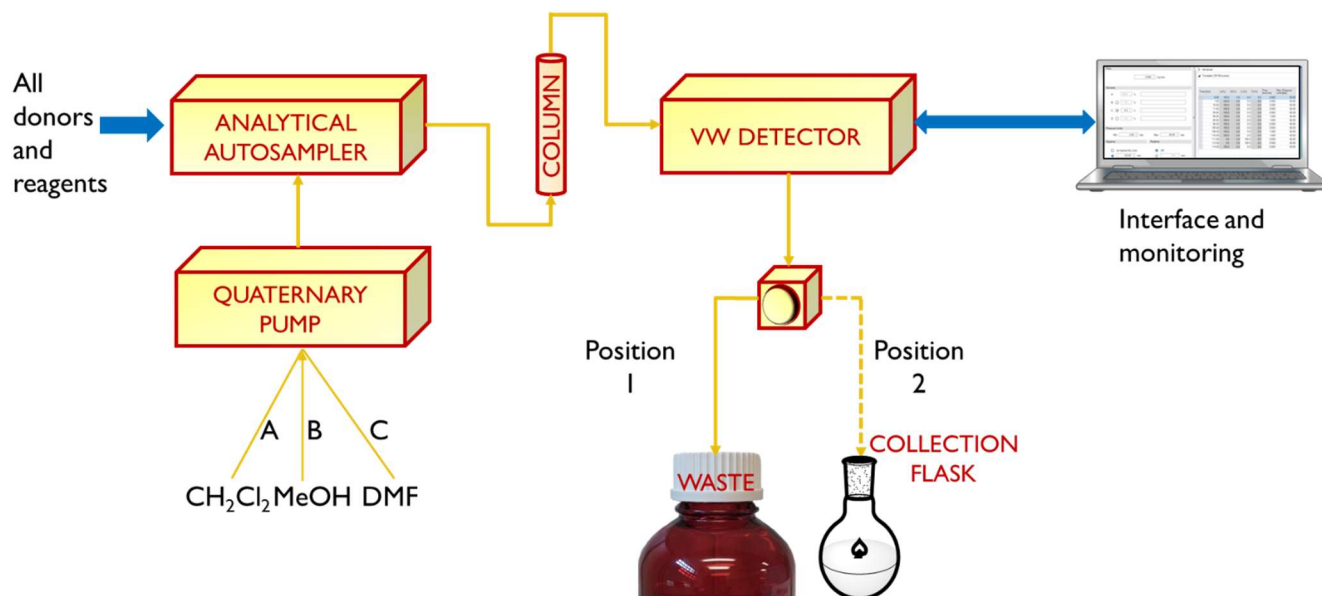

**Figure S1.** The HPLC-A synthesizer set up

### Synthesis of Crosslinker and Panzagal resin

**Di (ethylene glycol) bis (4-vinylbenzyl) ether (2)** was obtained in accordance with the reported procedure and its analytical data were in accordance with that previously described.<sup>1</sup>

Selected analytical data for **2**:  $^1\text{H}$  NMR (300 MHz,  $\text{CDCl}_3$ )  $\delta$  7.38 (d,  $J = 8.2$  Hz, 4H, aromatic), 7.30 (d,  $J = 8.2$  Hz, 4H, aromatic), 6.71 (dd,  $J = 17.6, 10.9$  Hz, 2H,  $\text{CHCH}_2$ ), 5.74 (dd,  $J = 17.6, 0.8$  Hz, 2H,  $\text{CHCH}_2$ -*trans*), 5.23 (dd,  $J = 10.9, 0.7$  Hz, 2H,  $\text{CHCH}_2$ -*cis*), 4.56 (s, 4H,  $\text{PhCH}_2$ ), 3.66 (m 16H,  $\text{OCH}_2\text{CH}_2$ );  $^{13}\text{C}$  NMR (75 MHz,  $\text{CDCl}_3$ )  $\delta$  137.94 ( $\text{CCH}_2$ ), 136.98 ( $\text{CCH}$ ), 136.59 ( $\text{CCHCH}_2$ ), 128.02 ( $\text{CH}$  aromatic), 126.28 ( $\text{CH}$  aromatic), 113.83 ( $\text{CH}_2\text{CH}$ ), 73.02 ( $\text{PhCH}_2$ ), 70.77 ( $\text{CH}_2\text{O}$ ), 69.46 ( $\text{CH}_2\text{O}$ ).

**Panzagal-Cl Resin (6)** was obtained in accordance with the reported procedure.<sup>2</sup> The polymer was analyzed using solid state FT-IR.

### **Panzagal-NH<sub>2</sub> Resin (7)**

To Panzagal-Cl beads (**6**) (1 g) in a round bottom flask equipped with a mechanical stirred, dimethylformamide (15 mL) was added. After swelling the polymer for 1 h, Phthalimide Potassium salt (1 g) was added and the mixture was stirred for 16 h at 55 °C. The resin was then washed with  $\text{CH}_2\text{Cl}_2$  (3 x 30 mL), MeOH (3 x 30 mL), acetone (3 x 30 mL) and water (3 x 30 mL) and dried at 60 °C under vacuum. The obtained polymer was swelled with MeOH: $\text{CHCl}_3 = 3:7$  for an hour in a flask equipped with a mechanical stirrer and  $\text{H}_2\text{NNH}_2 \cdot \text{H}_2\text{O}$  (3 mL) was added. The mixture was stirred at rt for 48 h. The resin was then washed with  $\text{CH}_2\text{Cl}_2$  (3 x 30 mL), MeOH (3 x 30 mL), acetone (3 x 30 mL) and water (3 x 30 mL) and dried at 60 °C under vacuum.

The polymer was characterized using FT-IR, SEM, BET and the presence of  $\text{NH}_2$  groups was confirmed using the Kaiser test.

## Synthesis of Glycosyl Donors and Glycosyl Acceptors

**2,3,4-Tri-*O*-benzoyl-6-*O*-(9-fluorenylmethoxycarbonyl)- $\alpha/\beta$ -D-glucopyranosyl trichloroacetimidate (**11**)** was obtained in accordance with the reported procedure and its analytical data were in accordance with that previously described.<sup>3</sup>

**8-(3-Carboxypropanoxy)oct-1-yl 2,3,4-tri-*O*-benzoyl-6-*O*-triphenylmethyl- $\alpha$ -D-glucopyranoside (**S1**)** was performed in accordance with the reported procedure and its analytical data were in accordance with that previously described.<sup>4</sup>

### **Conjugate 10**

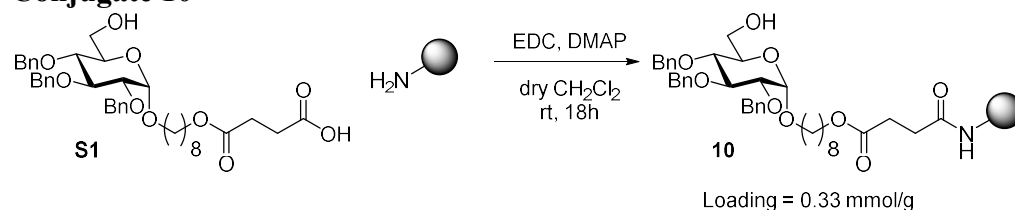

The title conjugate was obtained by reaction of **S1** with JandaJel performed in accordance with the reported procedure.<sup>4</sup> The loading of 0.33 mmol/g for **10** was determined by direct cleavage from the solid support (50 mg) on HPLC to mimic conditions for the subsequent reactions.

## Preparation of the reagent vials

All the solutions were freshly prepared using the ACS-grade solvents and kept at room temperature for the duration of the synthesis.

Donor: a solution of glycosyl donor **11** (103 mg, 0.12 mmol, 7.2 equiv) in CH<sub>2</sub>Cl<sub>2</sub> (2.7 mL), split in two vials containing 1.6 mL and 1.1 mL of solution.

Promoter: a solution of TMSOTf (22  $\mu$ L, 0.124 mmol, 7.5 equiv) in CH<sub>2</sub>Cl<sub>2</sub> (500  $\mu$ L). Both the amount were doubled to prepare an excess of acidic solution to acidify the resin after Fmoc removal.

Reagents for Fmoc removal: a solution of piperidine in DMF (2.5 mL, 2/3, v/v).

Reagents for cleaving off the resin: a solution prepared from 1M NaOMe in MeOH (1.5 mL), CH<sub>2</sub>Cl<sub>2</sub> (1.0 mL) and MeOH (1.0 mL), split equally in 2 vials.

Washing solutions and blanks: methylene chloride in W<sub>1</sub>, MeOH in W<sub>2</sub> and methylene chloride in B (2 mL).

## The Automated Assembly of Oligosaccharides

All reactions were carried using 50 mg of preloaded resin. The acceptor is loaded on the resin prior automation, therefore the loading depended on the batch of the resin. Syntheses with acceptor **10** were performed with 0.0165 mmol.

**Glycosylations.** The sequences are comprehensive of washings of the resin pre and after glycosylation steps. The glycosylations are split in 5 iterations of donor injections. The donor and the promoter are drawn from the vial, mixed in the needle seat and the injected. The flowrate is

lowered to maximize the permanence of the donor in the column. Once the activated donor has passed through the column, the same operation is repeated. At the end of the glycosylation the resin is washed with CH<sub>2</sub>Cl<sub>2</sub> and DMF.

In figure S3 the programming of the components of the synthesizer is reported. In figure 3A the pump timetable, in 3B the autosampler programmin. The valve was on position 1 during the whole sequence.

**Fmoc removal.** The reaction is monitored at  $\lambda = 301$  nm. The dibenzofulvene absorbance at 301 nm is a clear indication of the reaction completion. The removal is completed within 1 hour, including the washings and the resin is reacidified with TMSOTf as a last step. Even in this case, the valve was left in position 1 (waste) for the duration of the sequence. In figure S4 A, B and C the settings of the pump, autosampler and VWD respectively, are reported. Default volume is 500  $\mu$ L.

**Final cleavage.** The cleavage is performed in Zemplen conditions, with the solution prepared as reported above. The valve after the 30 seconds of the sequence switches from position 1 to position 2 and divert the flow to the collection flask. The reaction is monitored at both 250 nm and the sequence consists of 4 consecutive injections of the cleaving solution.

In figure S5 A, B and C are depicted the settings of the modules.

**Detection.** Representative UV traces for each sequence are depicted in Figure S6A, B and C. The absorbance of the donor at  $\lambda = 301$  nm is significantly lower compared to 250 nm, therefore the signals are not saturated and in some cases is easier to understand the proceeding of the reaction. The Fmoc removal trace **A** clearly indicates the majority of the temporary protecting group being removed in the first injection of the piperidine solution, with only minor amounts cleaved in the following injections.

The final cleavage trace **C** shows high absorbance during the injections, corresponding the the prograssive cleavage of the oligosaccharides from the resin and the Bz and Fmoc groups from the glycans. The absorbance decreases progressively during the washings.

**Flow**

0.500 mL/min

---

**Solvents**

A:  %

B:   %

C:   %

D:   %

---

**Pressure Limits**

Min:  bar    Max:  bar

---

**Stoptime**      **Posttime**

As Injector/No Limit       Off

min        min

Import Timetable...

**Advanced**

▲ Timetable (84/184 events)  function centric view

| Time [min] | A [%] | B [%] | C [%] | D [%] | Flow [mL/min] | Max. Pressure Limit [bar] |
|------------|-------|-------|-------|-------|---------------|---------------------------|
| 0.00       | 100.0 | 0.0   | 0.0   | 0.0   | 0.500         | 60.00                     |
| 1.00       | 100.0 | 0.0   | 0.0   | 0.0   | 2.000         | 60.00                     |
| 15.00      | 100.0 | 0.0   | 0.0   | 0.0   | 2.000         | 60.00                     |
| 16.00      | 100.0 | 0.0   | 0.0   | 0.0   | 1.000         | 60.00                     |
| 16.75      | 100.0 | 0.0   | 0.0   | 0.0   | 1.000         | 60.00                     |
| 16.80      | 100.0 | 0.0   | 0.0   | 0.0   | 0.050         | 60.00                     |
| 28.00      | 100.0 | 0.0   | 0.0   | 0.0   | 0.050         | 60.00                     |
| 28.10      | 100.0 | 0.0   | 0.0   | 0.0   | 1.000         | 60.00                     |
| 30.75      | 100.0 | 0.0   | 0.0   | 0.0   | 1.000         | 60.00                     |
| 30.80      | 100.0 | 0.0   | 0.0   | 0.0   | 0.050         | 60.00                     |
| 42.00      | 100.0 | 0.0   | 0.0   | 0.0   | 0.050         | 60.00                     |
| 42.10      | 100.0 | 0.0   | 0.0   | 0.0   | 1.000         | 60.00                     |
| 44.75      | 100.0 | 0.0   | 0.0   | 0.0   | 1.000         | 60.00                     |
| 44.80      | 100.0 | 0.0   | 0.0   | 0.0   | 0.050         | 60.00                     |
| 56.00      | 100.0 | 0.0   | 0.0   | 0.0   | 0.050         | 60.00                     |
| 56.10      | 100.0 | 0.0   | 0.0   | 0.0   | 1.000         | 60.00                     |
| 58.75      | 100.0 | 0.0   | 0.0   | 0.0   | 1.000         | 60.00                     |
| 58.80      | 100.0 | 0.0   | 0.0   | 0.0   | 0.050         | 60.00                     |
| 70.00      | 100.0 | 0.0   | 0.0   | 0.0   | 0.050         | 60.00                     |
| 70.10      | 100.0 | 0.0   | 0.0   | 0.0   | 1.000         | 60.00                     |
| 72.75      | 100.0 | 0.0   | 0.0   | 0.0   | 1.000         | 60.00                     |
| 72.80      | 100.0 | 0.0   | 0.0   | 0.0   | 0.050         | 60.00                     |
| 90.00      | 100.0 | 0.0   | 0.0   | 0.0   | 0.050         | 60.00                     |
| 90.10      | 100.0 | 0.0   | 0.0   | 0.0   | 1.000         | 60.00                     |
| 96.00      | 100.0 | 0.0   | 0.0   | 0.0   | 1.000         | 60.00                     |
| 97.00      | 0.0   | 0.0   | 100.0 | 0.0   | 1.000         | 60.00                     |
| 107.00     | 0.0   | 0.0   | 100.0 | 0.0   | 1.000         | 60.00                     |
| 108.00     | 100.0 | 0.0   | 0.0   | 0.0   | 1.000         | 60.00                     |
| 115.00     | 100.0 | 0.0   | 0.0   | 0.0   | 2.000         | 60.00                     |

Quat. Pump

VWD

■ Flow

■ Solvent Ratio

■ Solvent Ratio

■ Solvent Ratio

■ Solvent Ratio

**A**

| Function   | Parameter                                                                 |
|------------|---------------------------------------------------------------------------|
| ▶ Draw     | ▼ Draw 100 $\mu$ L from vial+ 1 with default speed using default offset   |
| Inject     | ▼ Inject                                                                  |
| Wait       | ▼ Wait 13 min                                                             |
| Repeat     | ▼ Repeat 3 time(s)                                                        |
| Draw       | ▼ Draw 500 $\mu$ L from sample with 700 $\mu$ L/min using default offset  |
| Draw       | ▼ Draw 100 $\mu$ L from vial+ 1 with 200 $\mu$ L/min using default offset |
| Wash       | ▼ Wash needle in location "97" 1 times                                    |
| Mix        | ▼ Mix 600 $\mu$ L from seat with maximum speed for 2 times                |
| Inject     | ▼ Inject                                                                  |
| Wait       | ▼ Wait 0.8 min                                                            |
| Valve      | ▼ Switch valve to "Bypass"                                                |
| Wait       | ▼ Wait 10 min                                                             |
| Eject      | ▼ Eject maximum volume to seat with maximum speed using default offset    |
| End Repeat | ▼ End Repeat                                                              |
| Repeat     | ▼ Repeat 2 time(s)                                                        |
| Draw       | ▼ Draw 500 $\mu$ L from vial+ 2 with 700 $\mu$ L/min using default offset |
| Draw       | ▼ Draw 100 $\mu$ L from vial+ 1 with 200 $\mu$ L/min using default offset |
| Wash       | ▼ Wash needle in location "97" 1 times                                    |
| Mix        | ▼ Mix 600 $\mu$ L from seat with maximum speed for 2 times                |
| Inject     | ▼ Inject                                                                  |
| Wait       | ▼ Wait 0.8 min                                                            |
| Valve      | ▼ Switch valve to "Bypass"                                                |
| Wait       | ▼ Wait 10 min                                                             |
| Eject      | ▼ Eject maximum volume to seat with maximum speed using default offset    |
| End Repeat | ▼ End Repeat                                                              |

**B**

**Figure S2.** Settings of the components of the HPLC synthesizer during glycosylation.

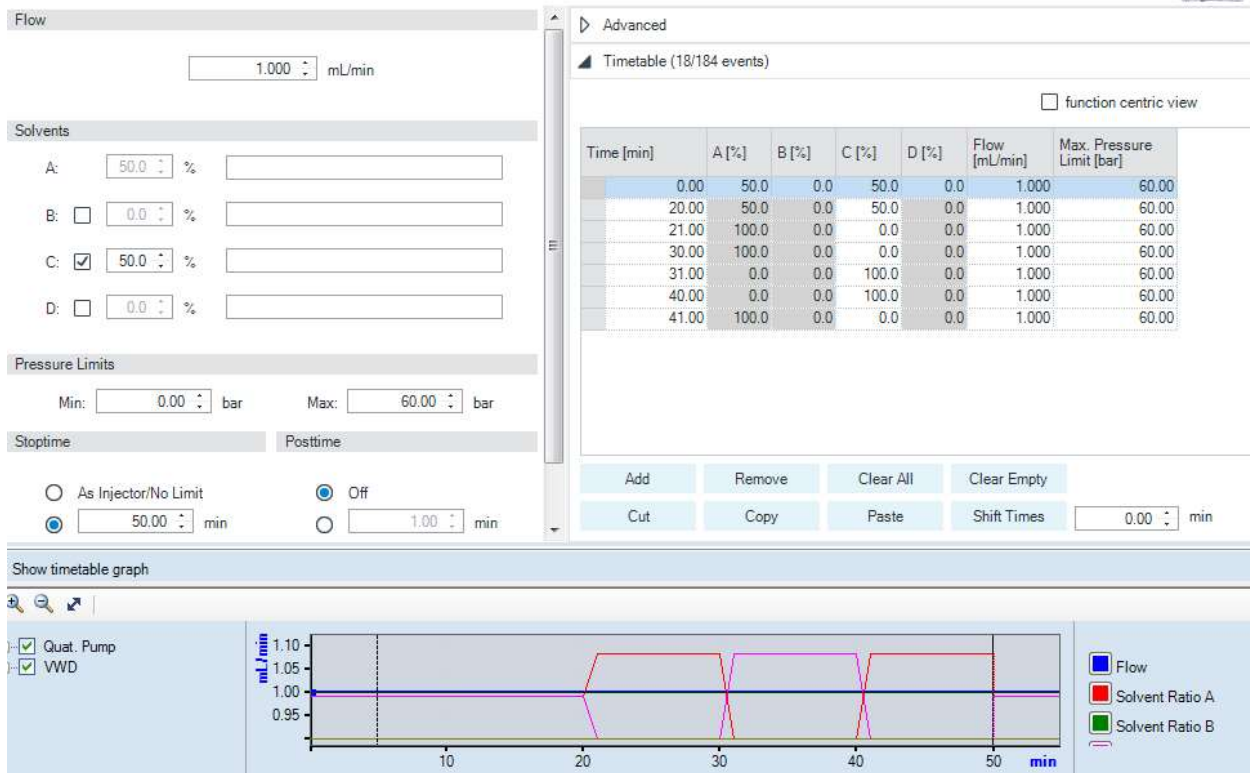

A

| Function   | Parameter                                                                      |
|------------|--------------------------------------------------------------------------------|
| Repeat     | Repeat 3 time(s)                                                               |
| Draw       | Draw default volume from sample with default speed using default offset        |
| Inject     | Inject                                                                         |
| Wait       | Wait 3 min                                                                     |
| Valve      | Switch valve to "Bypass"                                                       |
| Eject      | Eject default volume to seat with default speed using default offset           |
| End Repeat | End Repeat                                                                     |
| Draw       | Draw maximum volume from location "96" with maximum speed using default offset |
| Eject      | Eject maximum volume to seat with maximum speed using default offset           |
| Draw       | Draw 100 µL from vial+ -2 with 300 µL/min using default offset                 |
| Inject     | Inject                                                                         |
| Wash       | Wash needle in location "97" 3 times                                           |
| Wait       | Wait 30 min                                                                    |
| Draw       | Draw 100 µL from location "96" with default speed using default offset         |
| Eject      | Eject default volume to seat with default speed using default offset           |

B



Signal

|            | Acquire                              | Wavelength |
|------------|--------------------------------------|------------|
| Signal A:  | <input checked="" type="checkbox"/>  | 301 nm     |
| Peakwidth: | > 0.1 min (2 s resp. time) (3.43 Hz) |            |

C

**Figure S3.** Settings of the components of the HPLC synthesizer during Fmoc removal.

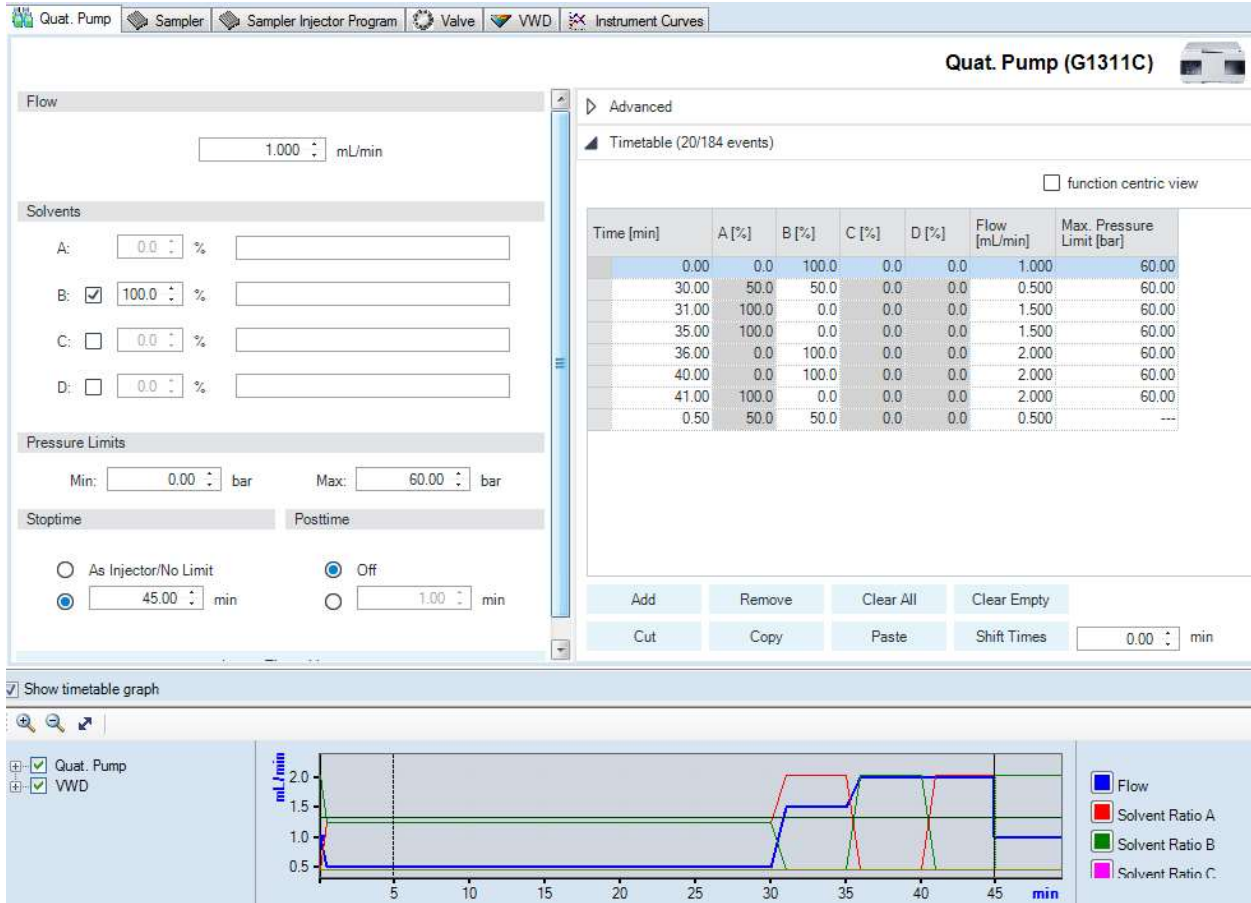

A

| Injection         |                                                                                   |
|-------------------|-----------------------------------------------------------------------------------|
| Injection volume: | 500.00 $\mu$ l                                                                    |
| Wait              | Wait 2 min                                                                        |
| Repeat            | Repeat 2 time(s)                                                                  |
| Draw              | Draw default volume from location "99" with 250 $\mu$ L/min using default offset  |
| Inject            | Inject                                                                            |
| Wait              | Wait 2.5 min                                                                      |
| Valve             | Switch valve to "Bypass"                                                          |
| Eject             | Eject maximum volume to seat with maximum speed using default offset              |
| Wash              | Wash needle in location "97" 1 times                                              |
| Wash              | Wash needle in location "98" 1 times                                              |
| Needle            | Move needle into seat                                                             |
| End Repeat        | End Repeat                                                                        |
| Repeat            | Repeat 2 time(s)                                                                  |
| Draw              | Draw default volume from location "100" with 250 $\mu$ L/min using default offset |
| Inject            | Inject                                                                            |
| Wait              | Wait 2.5 min                                                                      |
| Valve             | Switch valve to "Bypass"                                                          |
| Eject             | Eject maximum volume to seat with maximum speed using default offset              |
| Wash              | Wash needle in location "97" 1 times                                              |
| Wash              | Wash needle in location "98" 1 times                                              |
| Needle            | Move needle into seat                                                             |
| End Repeat        | End Repeat                                                                        |
| Eject             | Eject default volume to seat with default speed using default offset              |

**B**

Signal

Acquire      Wavelength

Signal A:         nm

Peakwidth:

Stoptime      Posttime

As Pump/Injector       Off

min        min

**C**

**Figure S4.** Settings of the components of the HPLC synthesizer during the final cleavage.

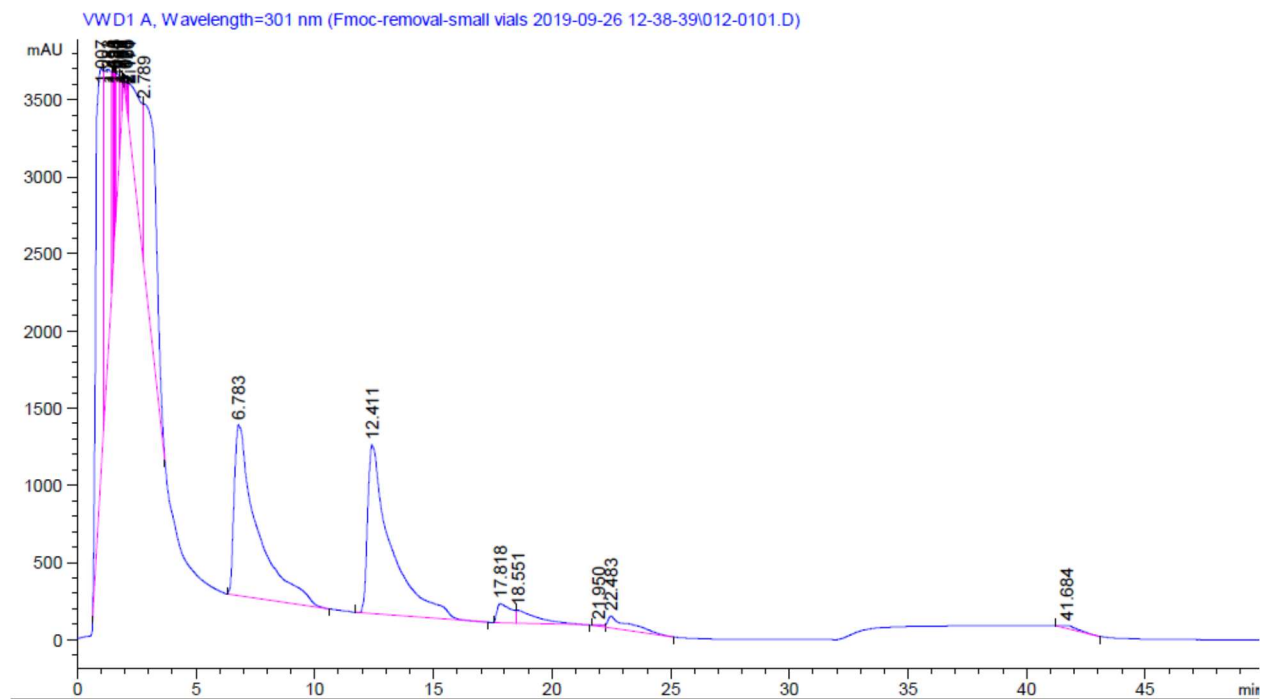

A. Representative trace for Fmoc removal

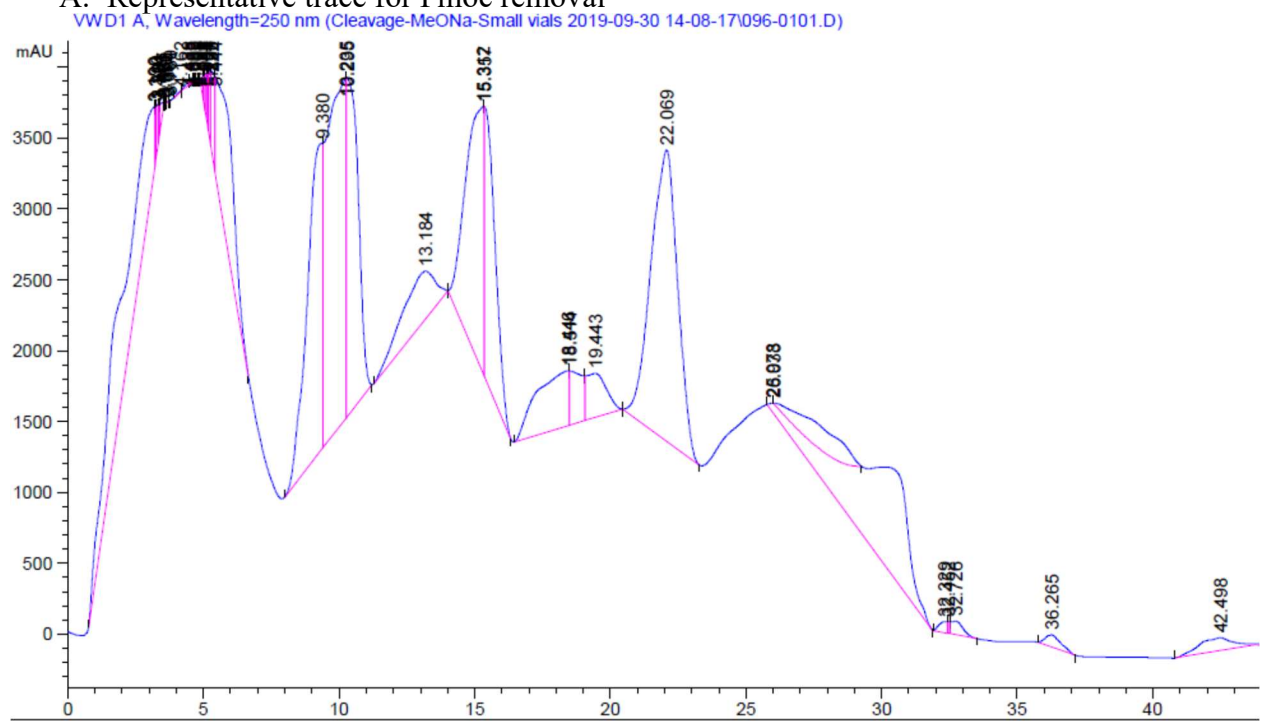

B. Representative trace for the final cleavage

Figure S5. UV traces for the synthetic steps

## Synthesis of disaccharide **8**

**8-Acetyloxyoct-1-yl** *O*-(2,3,4,6-tetra-*O*-acetyl- $\beta$ -D-glucopyranosyl)-(1 $\rightarrow$ 6)-2,3,4-tri-*O*-benzyl- $\alpha$ -D-glucopyranoside (**8**).

**Automation modules:** The Omnifit column is filled with resin (50 mg) preloaded with acceptor **10** (0.0165 mmol). The vials were prepared according to the general methods and organized as depicted below. Vials 1 and 3 contain donor **11** (103 mg, 0.12 mmol, 7.2 equiv) split as described in the general methods, vial 2 contains of TMSOTf (22  $\mu$ L, 0.124 mmol, 7.5 equiv), and vial 3 contains a piperine-DMF solution prepared as indicated in the general methods. Vials B, W and C are blank, washing, and final off-resin cleavage, respectively, were prepared as described in the general methods.

### Vial tray organization:

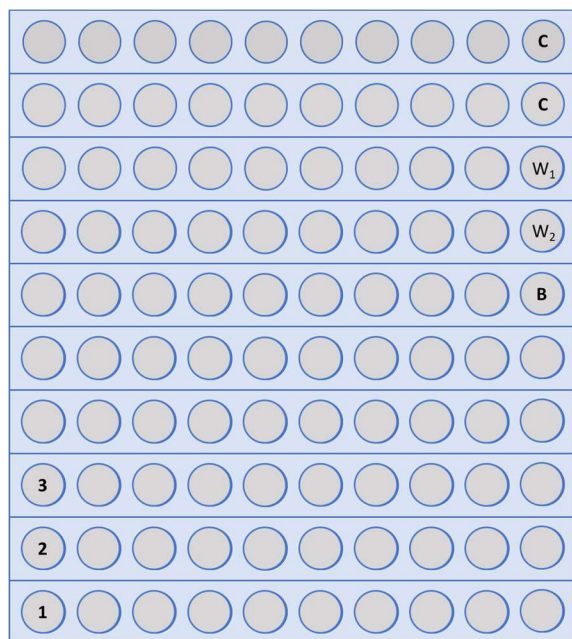

### Automation Sequence:

Glycosylation 120 min

Fmoc removal 60 min

**Post Automation:** The reaction mixture collected from cleavage step was evaporated under reduced pressure, then diluted with MeOH (2.0 mL) and quenched with Amberlite IR20 H<sup>+</sup> form. The resin was filtrated and washed with MeOH, the solvent was evaporated and dried *in vacuo* for 1h. The crude was dissolved in pyridine (2.0 mL) and acetic anhydride (0.5 mL) was added. The resulting mixture was stirred under argon at room temperature for 16h. The reaction was quenched with MeOH, then the solvent was evaporated and co-evaporated with toluene. The residue was purified by column chromatography on silica gel (hexanes-acetone gradient elution) to afford compound **8** in 80% yield (12.2 mg, 0.0128 mmol). Analytical data matched what has been previously reported.<sup>4</sup>

## Synthesis of pentasaccharide 9

**8-Acetyloxyoct-1-yl *O*-(2,3,4,6-tetra-*O*-acetyl- $\beta$ -D-glucopyranosyl)-(1 $\rightarrow$ 6)-*O*-(2,3,4-tri-*O*-acetyl- $\beta$ -D-glucopyranosyl)-(1 $\rightarrow$ 6)-*O*-(2,3,4-tri-*O*-acetyl- $\beta$ -D-glucopyranosyl)-(1 $\rightarrow$ 6)-*O*-(2,3,4-tri-*O*-acetyl- $\beta$ -D-glucopyranosyl)-(1 $\rightarrow$ 6)-2,3,4-tri-*O*-benzyl- $\alpha$ -D-glucopyranoside (9).**

**Automation modules:** The Omnifit column is filled with resin (50 mg) preloaded with acceptor **10** (0.0165 mmol). The vials were prepared according to the general methods and organized as depicted below. Vials 1 and 3 contain donor **11** (103 mg, 0.12 mmol, 7.2 equiv) split as described in the general methods, vial 2 contains TMSOTf (22  $\mu$ L, 0.124 mmol, 7.5 equiv), and vial 3 contains a piperine-DMF solution prepared as indicated in the general methods. Vials B, W and C are blank, washing, and final off-resin cleavage, respectively, were prepared as described in the general methods.

### Vial tray organization:

|   |   |  |  |  |  |  |  |  |  |                |
|---|---|--|--|--|--|--|--|--|--|----------------|
| 2 |   |  |  |  |  |  |  |  |  | C              |
| 1 | 3 |  |  |  |  |  |  |  |  | C              |
| 4 | 2 |  |  |  |  |  |  |  |  | W <sub>1</sub> |
| 3 | 1 |  |  |  |  |  |  |  |  | W <sub>2</sub> |
| 2 | 4 |  |  |  |  |  |  |  |  | B              |
| 1 | 3 |  |  |  |  |  |  |  |  |                |
| 4 | 2 |  |  |  |  |  |  |  |  |                |
| 3 | 1 |  |  |  |  |  |  |  |  |                |
| 2 | 4 |  |  |  |  |  |  |  |  |                |
| 1 | 3 |  |  |  |  |  |  |  |  |                |

### Automation Sequence:

Glycosylation 120 min  
Fmoc removal 60 min  
Glycosylation 120 min  
Fmoc removal 60 min  
Glycosylation 120 min  
Fmoc removal 60 min  
Glycosylation 120 min  
Final Cleavage 50 min

**Post Automation:** The reaction mixture collected from cleavage step was evaporated under reduced pressure, then diluted with MeOH (2.0 mL) and quenched with Amberlite IR20 H<sup>+</sup> form. The resin was filtrated and washed with MeOH, the solvent was evaporated and dried *in vacuo* for 1h. The crude was dissolved in pyridine (2.0 mL) and acetic anhydride (0.5 mL) was added. The resulting mixture was stirred under argon at room temperature for 16h. The reaction was quenched with MeOH, then the solvent was evaporated and co-evaporated with toluene. The residue was purified by column chromatography on silica gel (hexanes-acetone gradient elution) to afford compound **9** in 30% yield (8.7 mg, 0.0048 mmol). Analytical data matched what has been previously reported.<sup>5</sup>

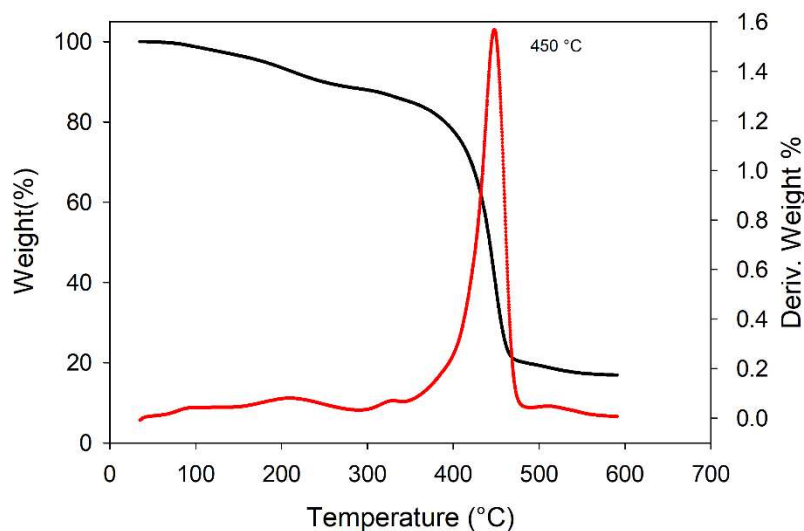

**Figure S6.** Thermogravimetric analysis (TGA) plots (black line) and Weight derivatives curves (red line) of Panzagal-TMSOTf

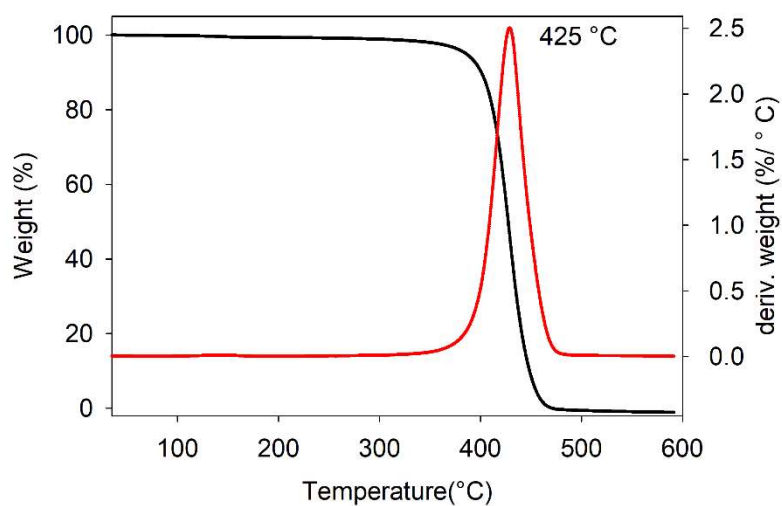

**Figure S7.** Thermogravimetric analysis (TGA) plots (black line) and Weight derivatives curves (red line) of Panzagal

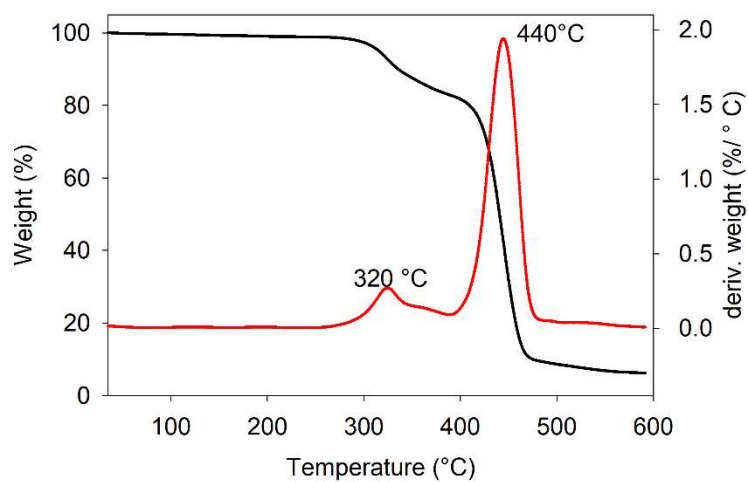

**Figure S8.** Thermogravimetric analysis (TGA) plots (black line) and Weight derivatives curves (red line) of Panzagal-TMSOTf

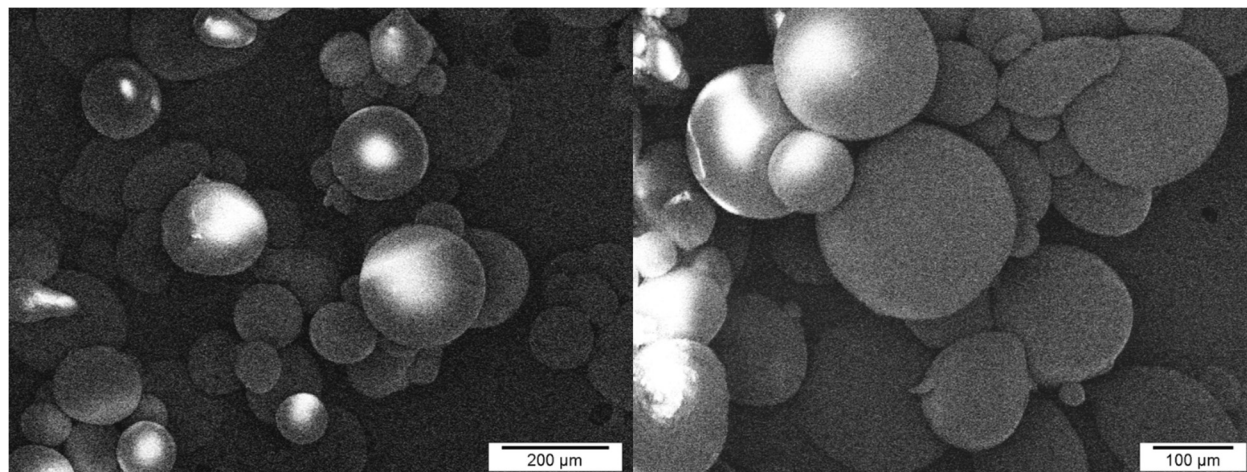

**Figure S9.** SEM images of Panzagal-TMSOTf polymer at a)100x and b) 150x magnifications



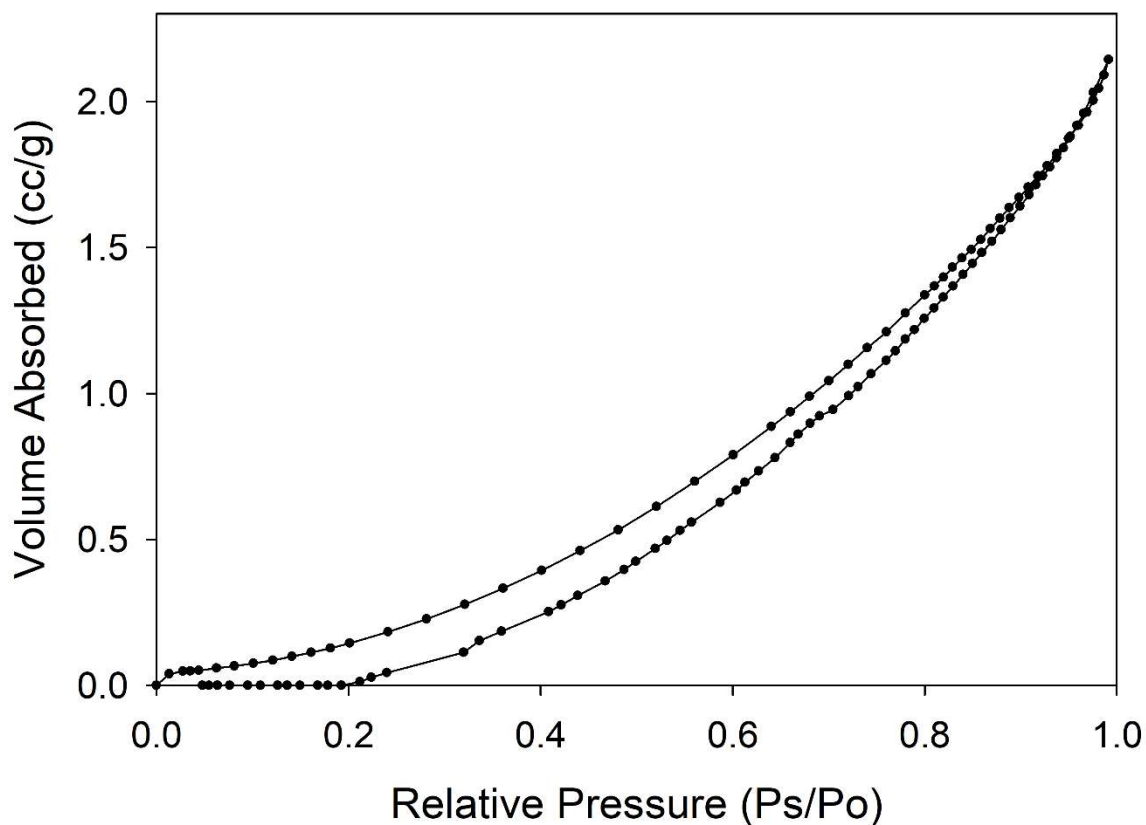

**Figure S10.** BET adsorption-desorption curves of the Panzage

**References:**

1. M. E. Wilson, K. Paech, W.-J. Zhou and M. J. Kurth, *J. Org. Chem.*, 1998, **63**, 5094-5099.
2. P. H. Toy, T. S. Reger, P. Garibay, J. C. Garno, J. A. Malikayil, G.-y. Liu and K. D. Janda, *J. Comb. Chem.*, 2001, **3**, 117-124.
3. N. Vijaya Ganesh, K. Fujikawa, Y. H. Tan, K. J. Stine and A. V. Demchenko, *Org. Lett.*, 2012, **14**, 3036-3039.
4. S. G. Pistorio, S. S. Nigudkar, K. J. Stine and A. V. Demchenko, *J. Org. Chem.*, 2016, **81**, 8796-8805.
5. M. Panza, K. J. Stine and A. V. Demchenko, *Chem. Commun.*, 2020, **56**, 1333-1336.

## IR Spectra

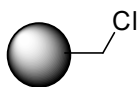

6

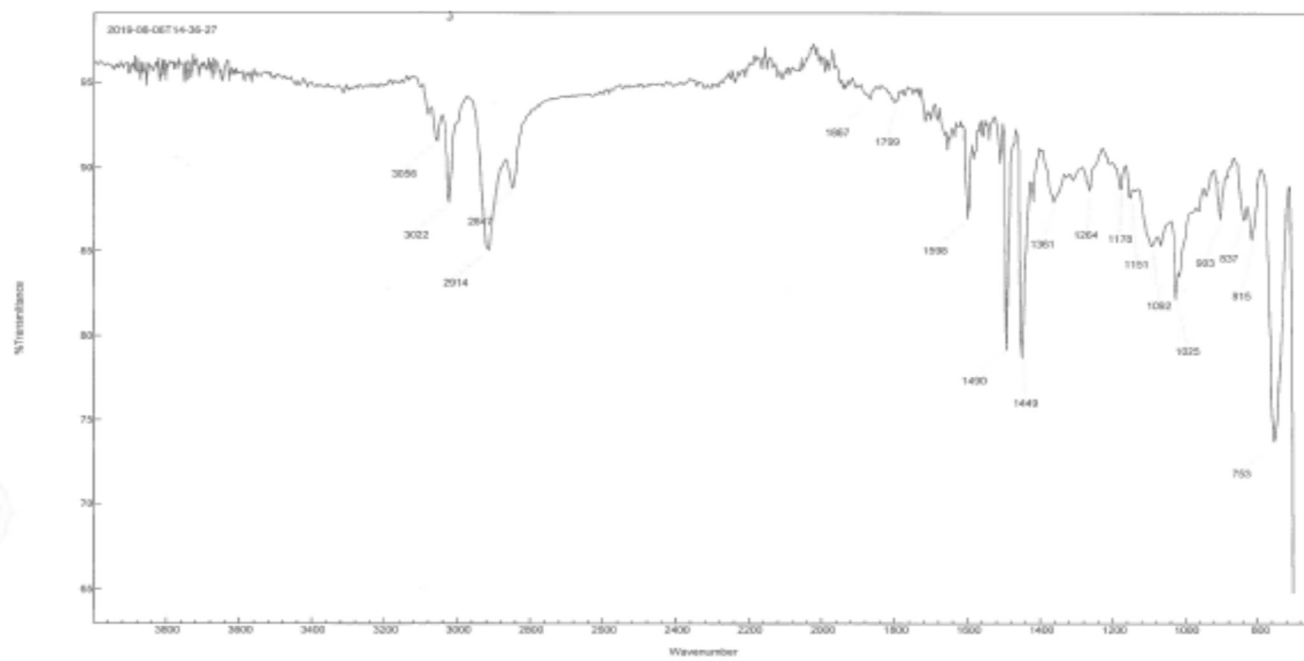

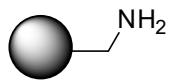

7

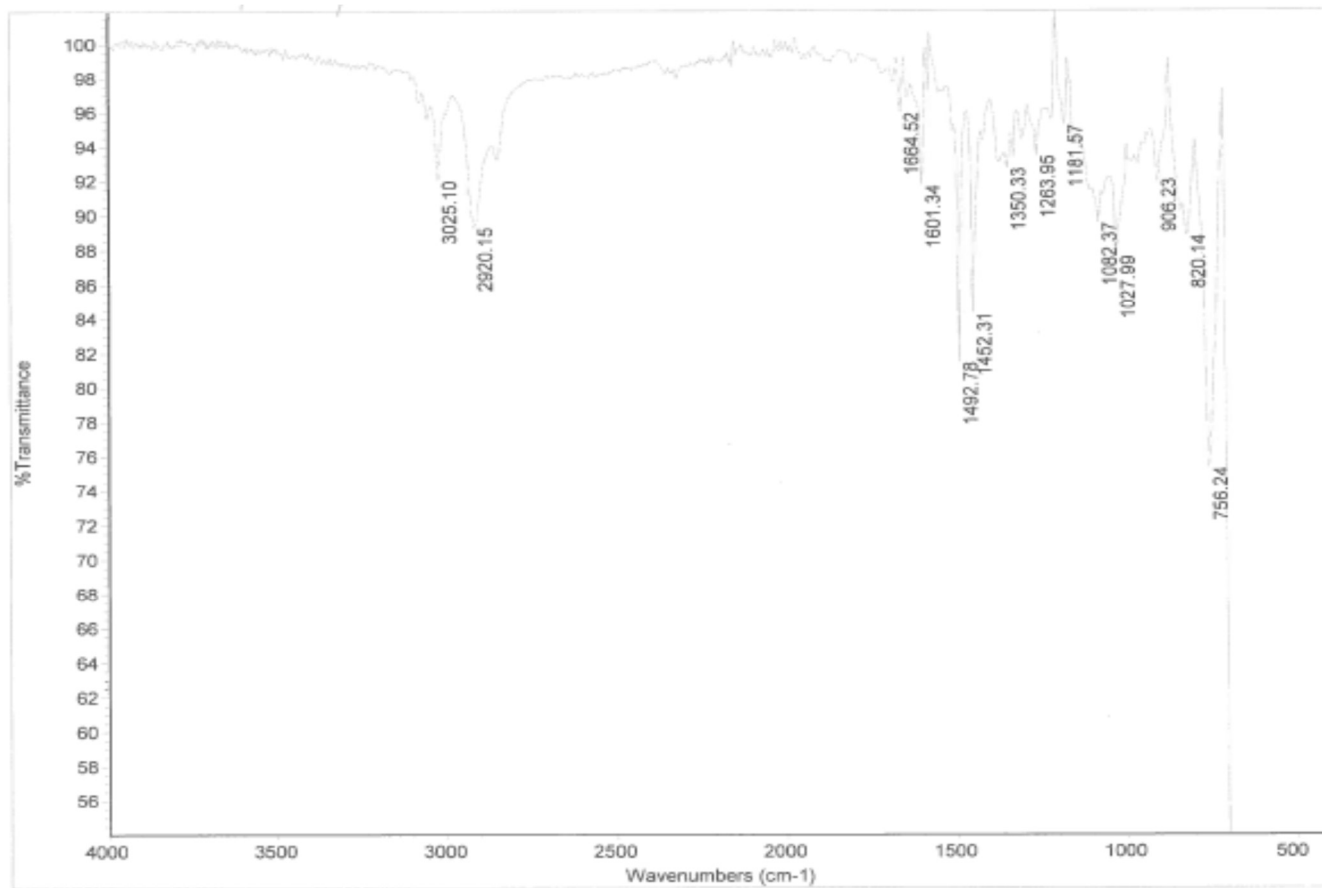

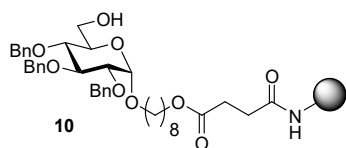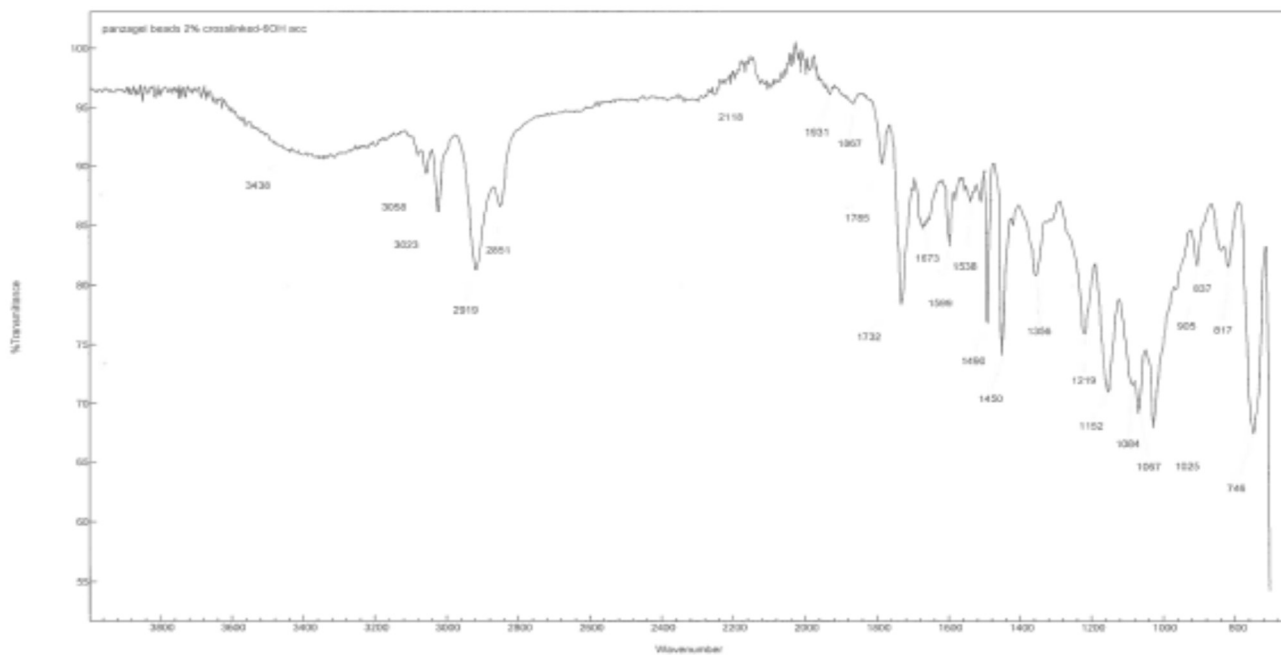

## NMR spectra

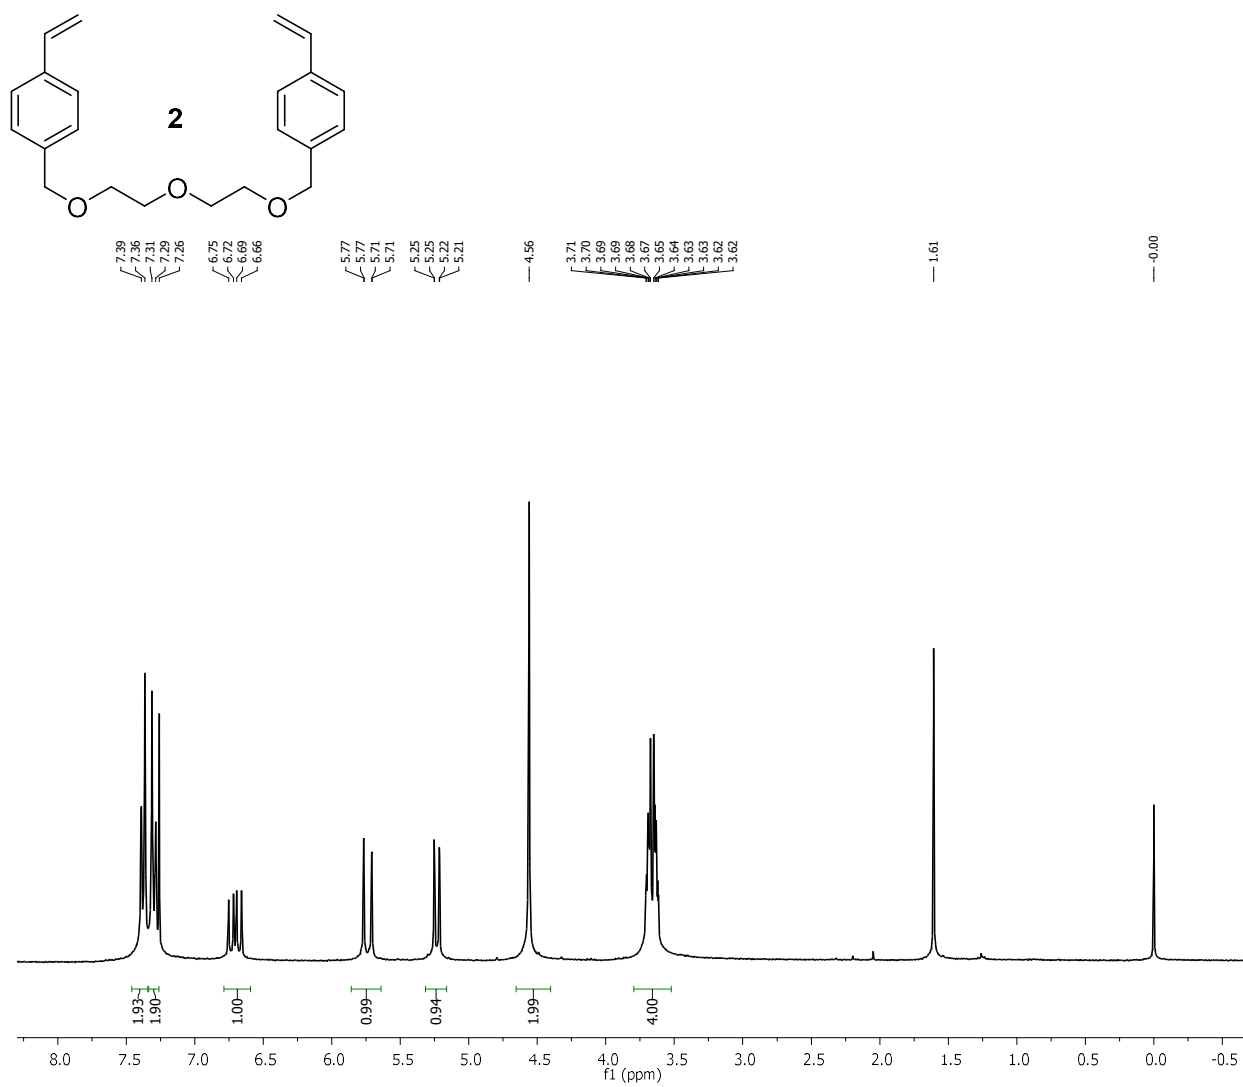

$^1\text{H}$  NMR ( $\text{CDCl}_3$ , 300 MHz)

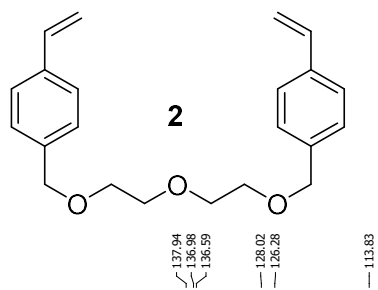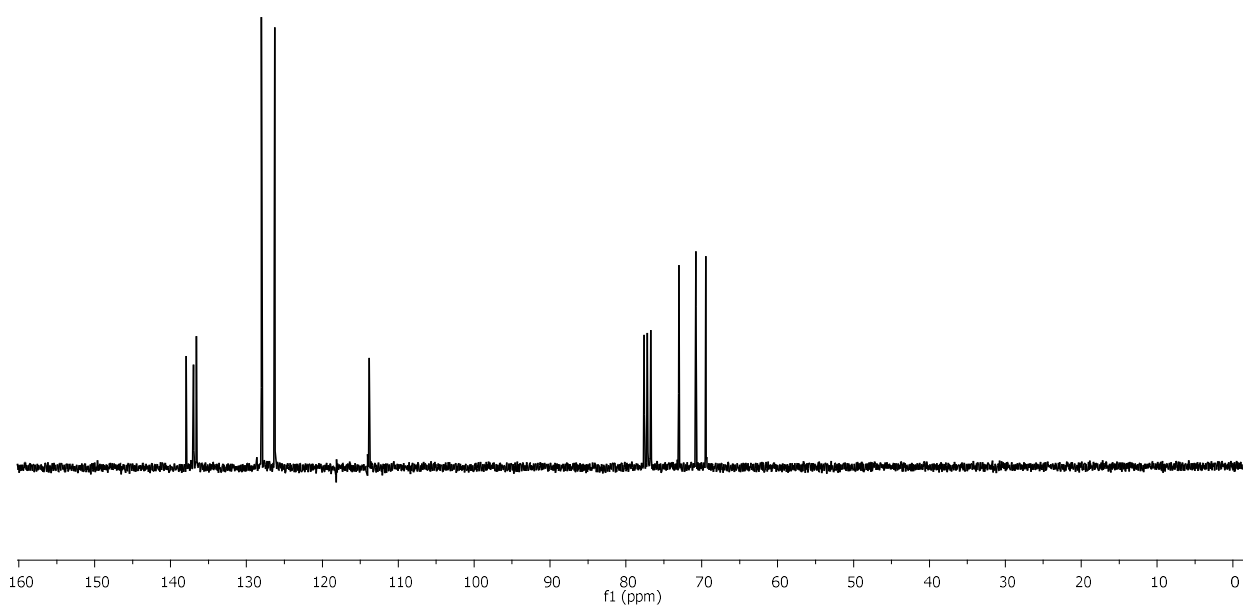

$^{13}\text{C}$  NMR ( $\text{CDCl}_3$ , 75 MHz)

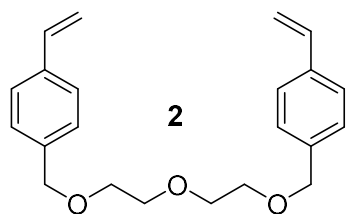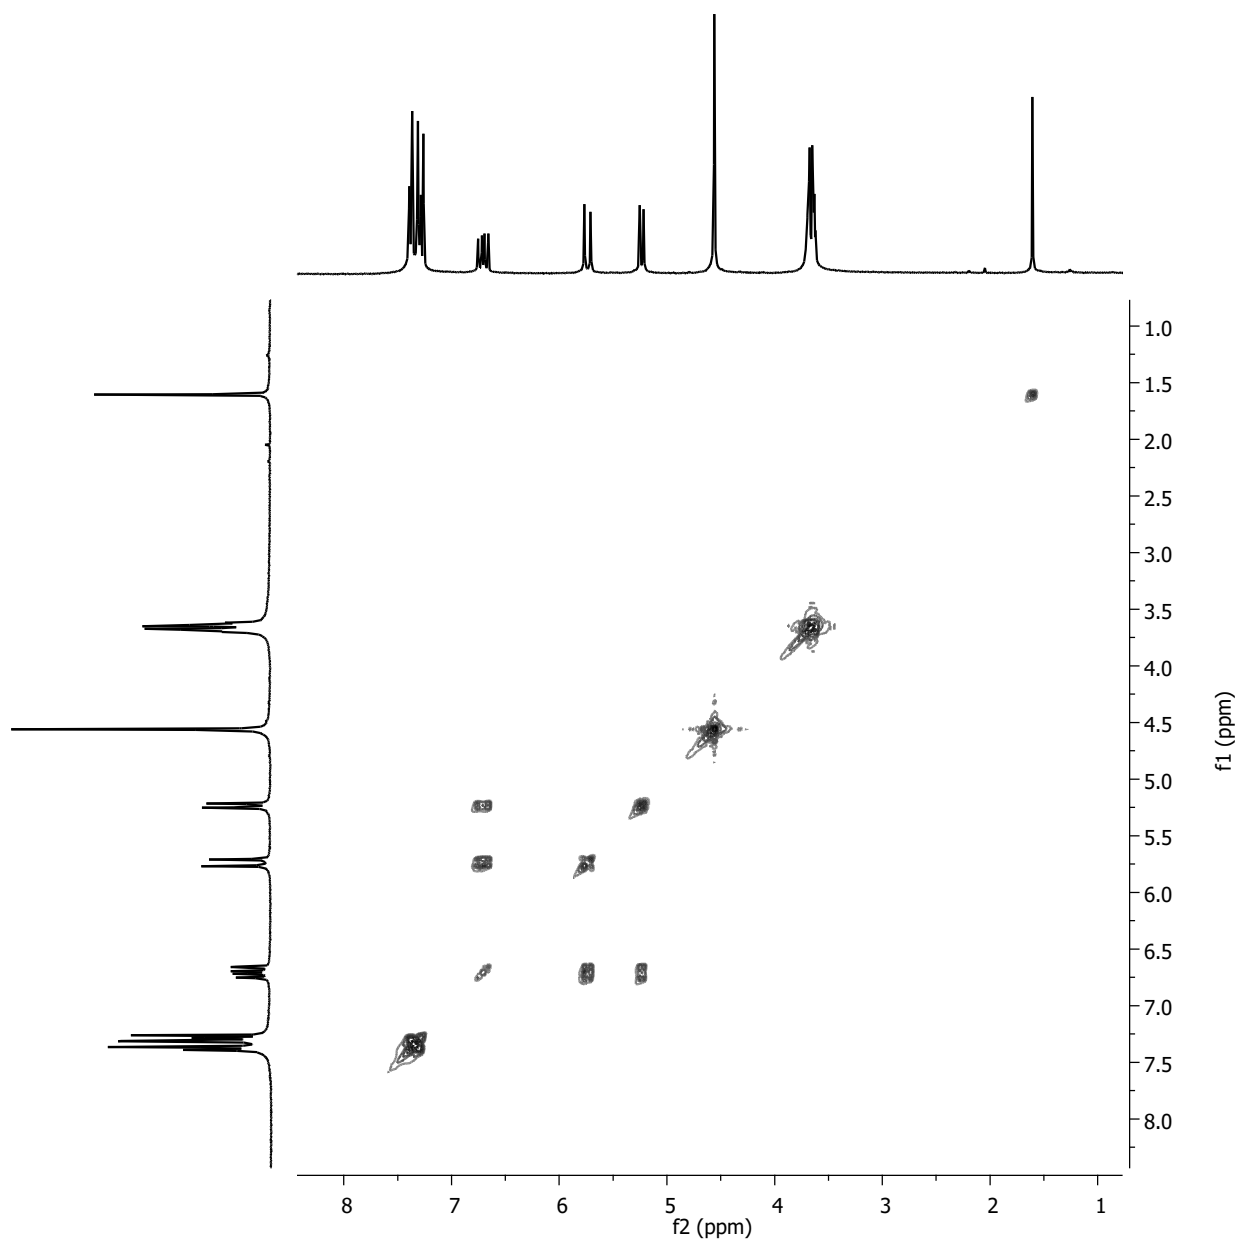

COSY NMR (CDCl<sub>3</sub>, 300 MHz)

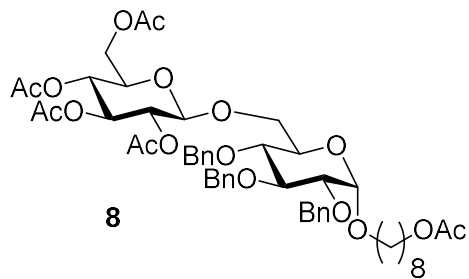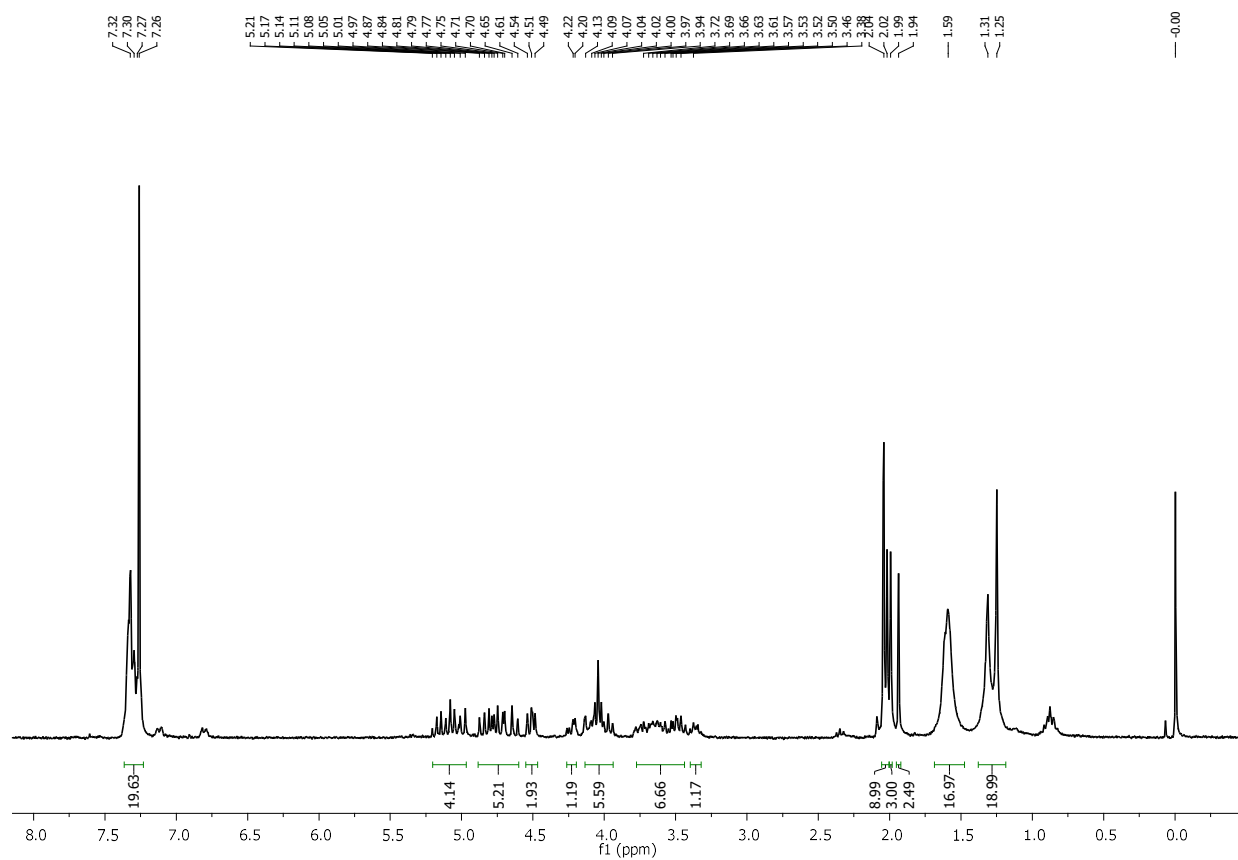

$^1\text{H}$  NMR (CDCl<sub>3</sub>, 300 MHz)





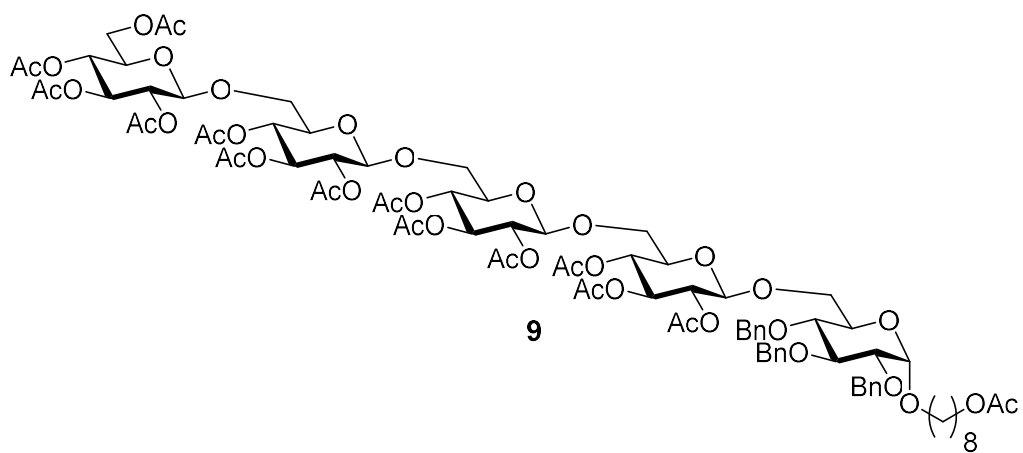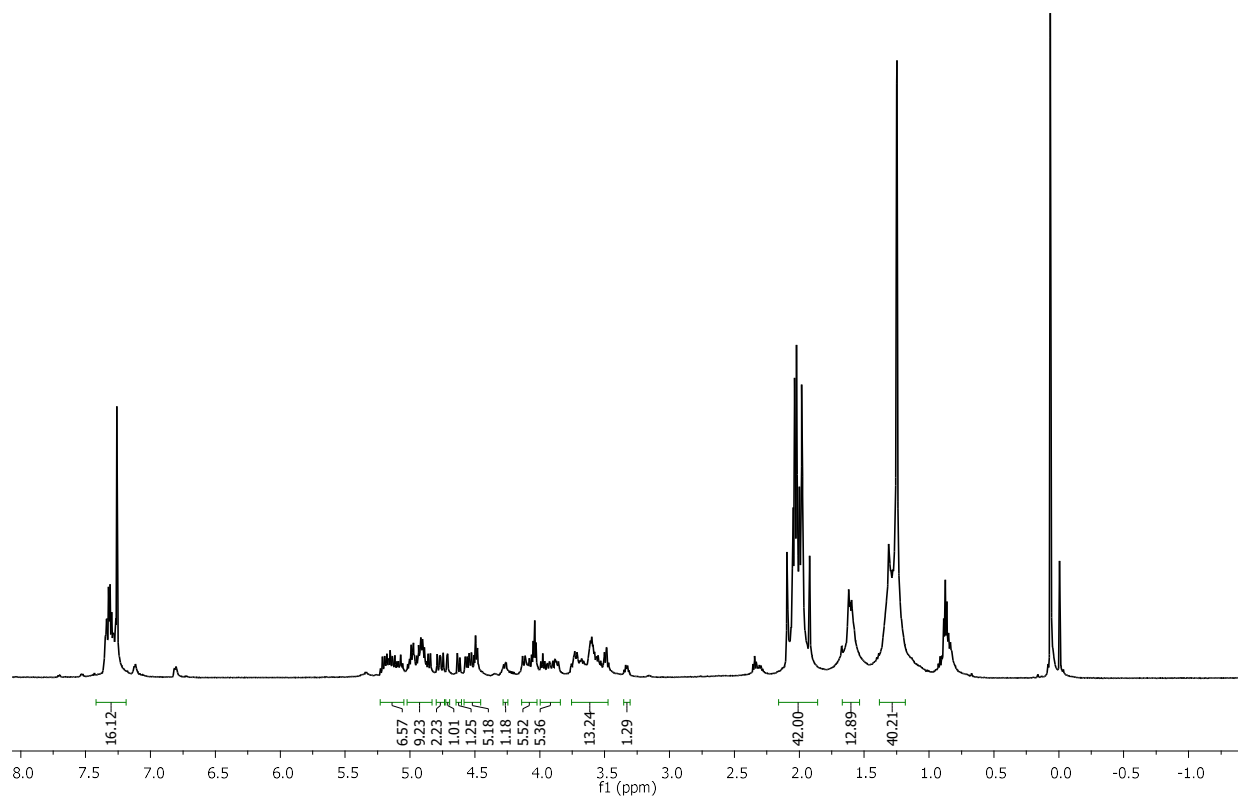

$^1\text{H NMR}$  ( $\text{CDCl}_3$ , 600 MHz)

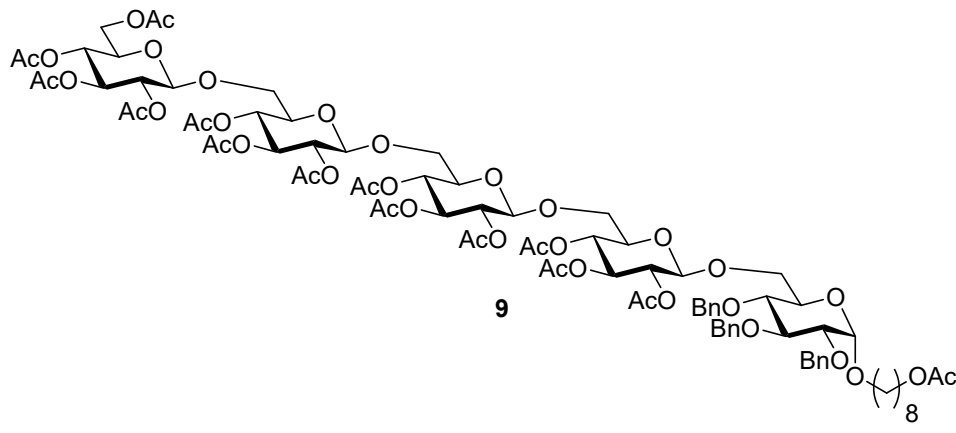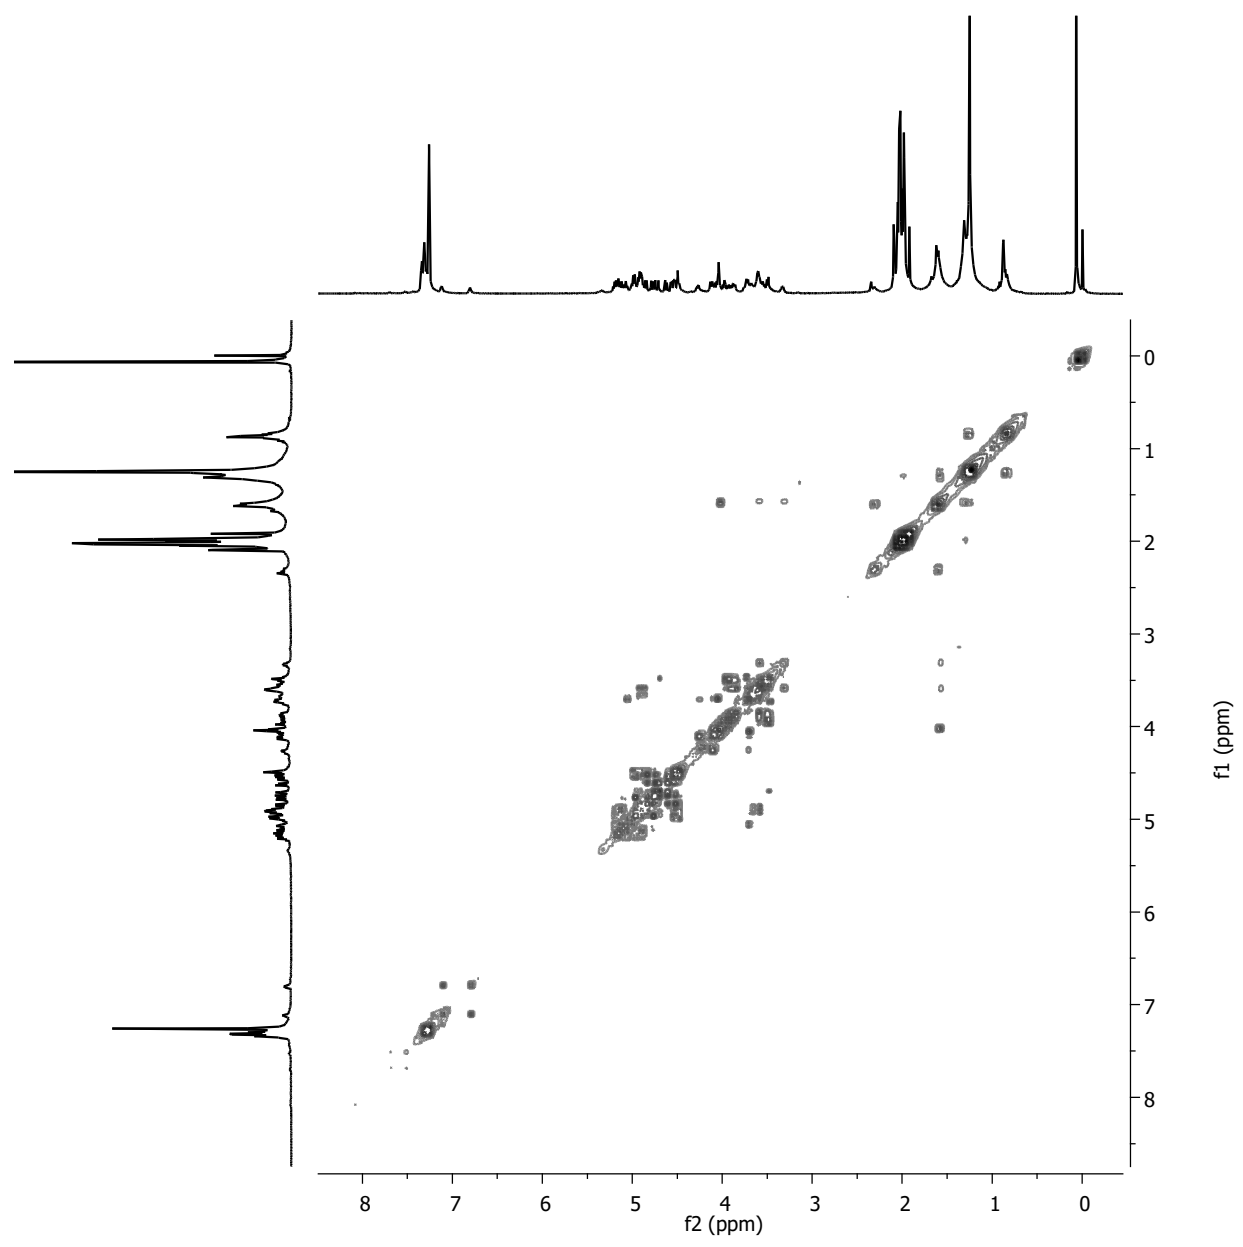

COSY NMR (CDCl<sub>3</sub>, 600 MHz)
